# Supplementary material
Source: Springer Nature journal article supplement (https://www.springermedizin.de/resource/supplementary/12882_2013_743_MOESM4_ESM.pdf/9454624)

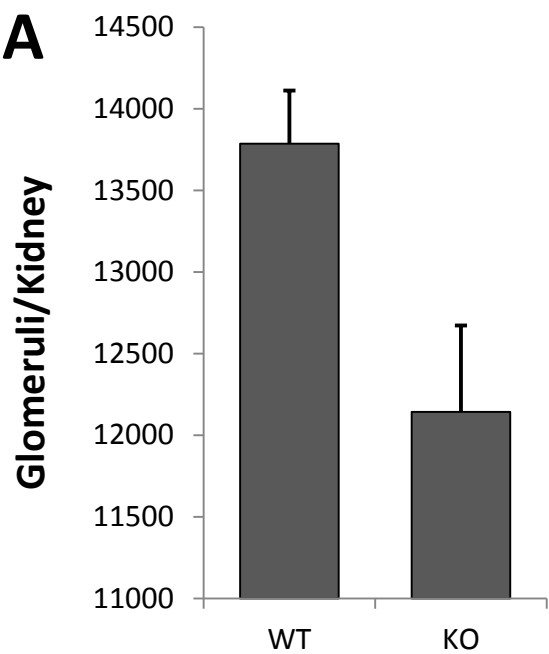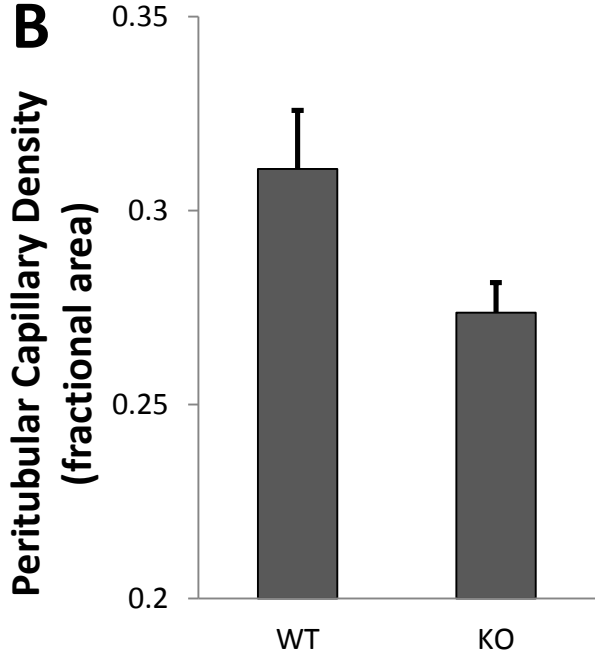

Supplement: MOESM4 [file 9454624]
